# Supplementary material for: Vitamin D Receptor Gene Polymorphism Predicts the Outcome of Multidisciplinary Rehabilitation in Multiple Sclerosis Patients
Source: MDPI journal article supplement (doi:10.3390/ijms241713379), 2023-08-29
Supplement: s1 [file s1]

|      |                  | EDSS T0 |     | EDSS T1 |     | repeated<br>measure<br>pvalue | mBI T0 |      | mBI T1 |      | repeated<br>measure<br>p value | NRS T0 |      | NRS T1 |     | repeated<br>measure<br>p value |
|------|------------------|---------|-----|---------|-----|-------------------------------|--------|------|--------|------|--------------------------------|--------|------|--------|-----|--------------------------------|
|      |                  | median  | IQR | median  | IQR |                               | median | IQR  | median | IQR  |                                | median | IQR  | median | IQR |                                |
| pMS  | rs731236 TaqI    |         |     |         |     |                               |        |      |        |      |                                |        |      |        |     |                                |
|      | TT               | 6,5     | 1   | 6,5     | 0,5 |                               | 62     | 26,3 | 71,5   | 26,3 |                                | 5      | 4    | 3      | 4   |                                |
|      | TC               | 7       | 1,5 | 7       | 1,5 |                               | 51,5   | 26,8 | 61,5   | 29   |                                | 5      | 3,3  | 2      | 4   |                                |
|      | CC               | 7       | 1,5 | 6,5     | 1,5 |                               | 58     | 38   | 66     | 39   |                                | 6      | 3    | 3      | 5   |                                |
|      |                  |         |     |         |     | ns                            |        |      |        |      | ns                             |        |      |        |     | ns                             |
|      | rs7975232 3 Apal |         |     |         |     |                               |        |      |        |      |                                |        |      |        |     |                                |
|      | AA               | 7       | 1,5 | 6,5     | 1   |                               | 60     | 31   | 66     | 27   |                                | 5,5    | 3    | 3      | 4   |                                |
|      | AC               | 7       | 1,5 | 6,5     | 1,5 |                               | 56     | 32   | 62     | 33   |                                | 5      | 3    | 2      | 4   |                                |
|      | CC               | 6,5     | 0,5 | 6,5     | 0,5 |                               | 60     | 29,5 | 71     | 26,5 |                                | 6      | 4    | 3      | 4   |                                |
|      |                  |         |     |         |     | ns                            |        |      |        |      | ns                             |        |      |        |     | ns                             |
|      | rs10735810 FokI  |         |     |         |     |                               |        |      |        |      |                                |        |      |        |     |                                |
|      | CC               | 6,5     | 1,5 | 6,5     | 1,8 |                               | 61     | 32   | 65     | 32   |                                | 5      | 4    | 3      | 4   |                                |
|      | CT               | 7       | 1,5 | 6,5     | 1,5 |                               | 54     | 29   | 61     | 35   |                                | 5      | 3    | 3      | 4   |                                |
|      | TT               | 6,5     | 1,5 | 6,5     | 1   |                               | 58     | 32   | 68     | 25,5 |                                | 5      | 6    | 2      | 4   |                                |
| RRMS |                  |         |     |         |     | ns                            |        |      |        |      | ns                             |        |      |        |     | ns                             |
|      | rs731236 TaqI    |         |     |         |     |                               |        |      |        |      |                                |        |      |        |     |                                |
|      | TT               | 6       | 1   | 6       | 1,5 |                               | 71     | 12,5 | 83     | 12   |                                | 7      | 4    | 3      | 5   |                                |
|      | TC               | 6       | 1,4 | 6       | 1,5 |                               | 78,5   | 8    | 83,5   | 9,75 |                                | 4,5    | 2,75 | 3      | 4   |                                |
|      | CC               | 6       | 1,5 | 5,5     | 2   |                               | 76     | 12   | 82     | 13   |                                | 6      | 3    | 3      | 2   |                                |
|      |                  |         |     |         |     | ns                            |        |      |        |      | p<0,001                        |        |      |        |     | ns                             |
|      | rs7975232 3 Apal |         |     |         |     |                               |        |      |        |      |                                |        |      |        |     |                                |
|      | AA               | 6       | 1,5 | 5,5     | 1,9 |                               | 76     | 11,5 | 82,5   | 10,5 |                                | 6      | 3    | 3      | 2,5 |                                |
|      | AC               | 6       | 1,5 | 6       | 1,5 |                               | 74,5   | 15,3 | 84     | 12,5 |                                | 5      | 4    | 3      | 4   |                                |
|      | CC               | 6       | 0,9 | 6       | 1,4 |                               | 70     | 13,5 | 80,5   | 7,8  |                                | 7      | 3    | 2,5    | 28  |                                |
|      |                  |         |     |         |     | ns                            |        |      |        |      | p=0,01                         |        |      |        |     | ns                             |
|      | rs10735810 FokI  |         |     |         |     |                               |        |      |        |      |                                |        |      |        |     |                                |
|      | CC               | 6       | 0,5 | 5       | 1   |                               | 72,5   | 15,8 | 81,5   | 8,2  |                                | 5      | 3    | 3      | 2,5 |                                |
|      | CT               | 6       | 1,5 | 5,5     | 2   |                               | 75     | 13,5 | 8      | 12   |                                | 5      | 3    | 2      | 4   |                                |
|      | TT               | 6       | 1   | 5,5     | 1,9 | ns                            | 79     | 9,8  | 87,5   | 12,5 | ns                             | 5,5    | 3,5  | 3      | 4,8 | ns                             |

**Table S1:** EDSS, mBI and pain NRS values at the admittance (T0) and after MDR (T1) were reported as median and Interquartile range (IQR), Pair data analysis for repeated measure was performed in pMS and RRMS patients in relation to VDR SNPs . Significant p values are reported for TaqI and ApaI genotypes in RRMS patients  $p < 0.001$  and  $p = 0.01$  respectively.
